# Supplementary material for: Description of Komagataeibacter melaceti sp. nov. and Komagataeibacter melomenusus sp. nov. Isolated from Apple Cider Vinegar
Source: PubMed Central journal article supplement (PMC7465234; doi:10.3390/microorganisms8081178), 2020-08-03
Supplement: microorganisms-08-01178-s001.pdf [file microorganisms-08-01178-s001.pdf]

## Supplementary Materials

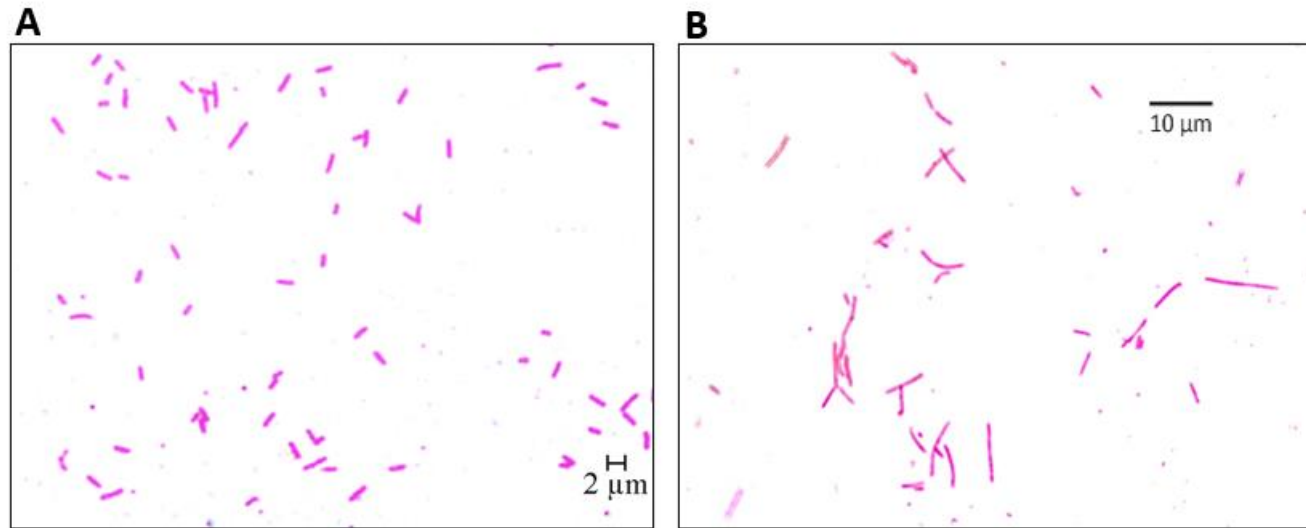

**Supplementary Figure S1:** Microscopic images of bacterial cells after Gram-staining at 1000-fold magnification. A: *Komagataeibacter melaceti* AV382<sup>T</sup>, B: *Komagataeibacter melomenus* AV436<sup>T</sup>.

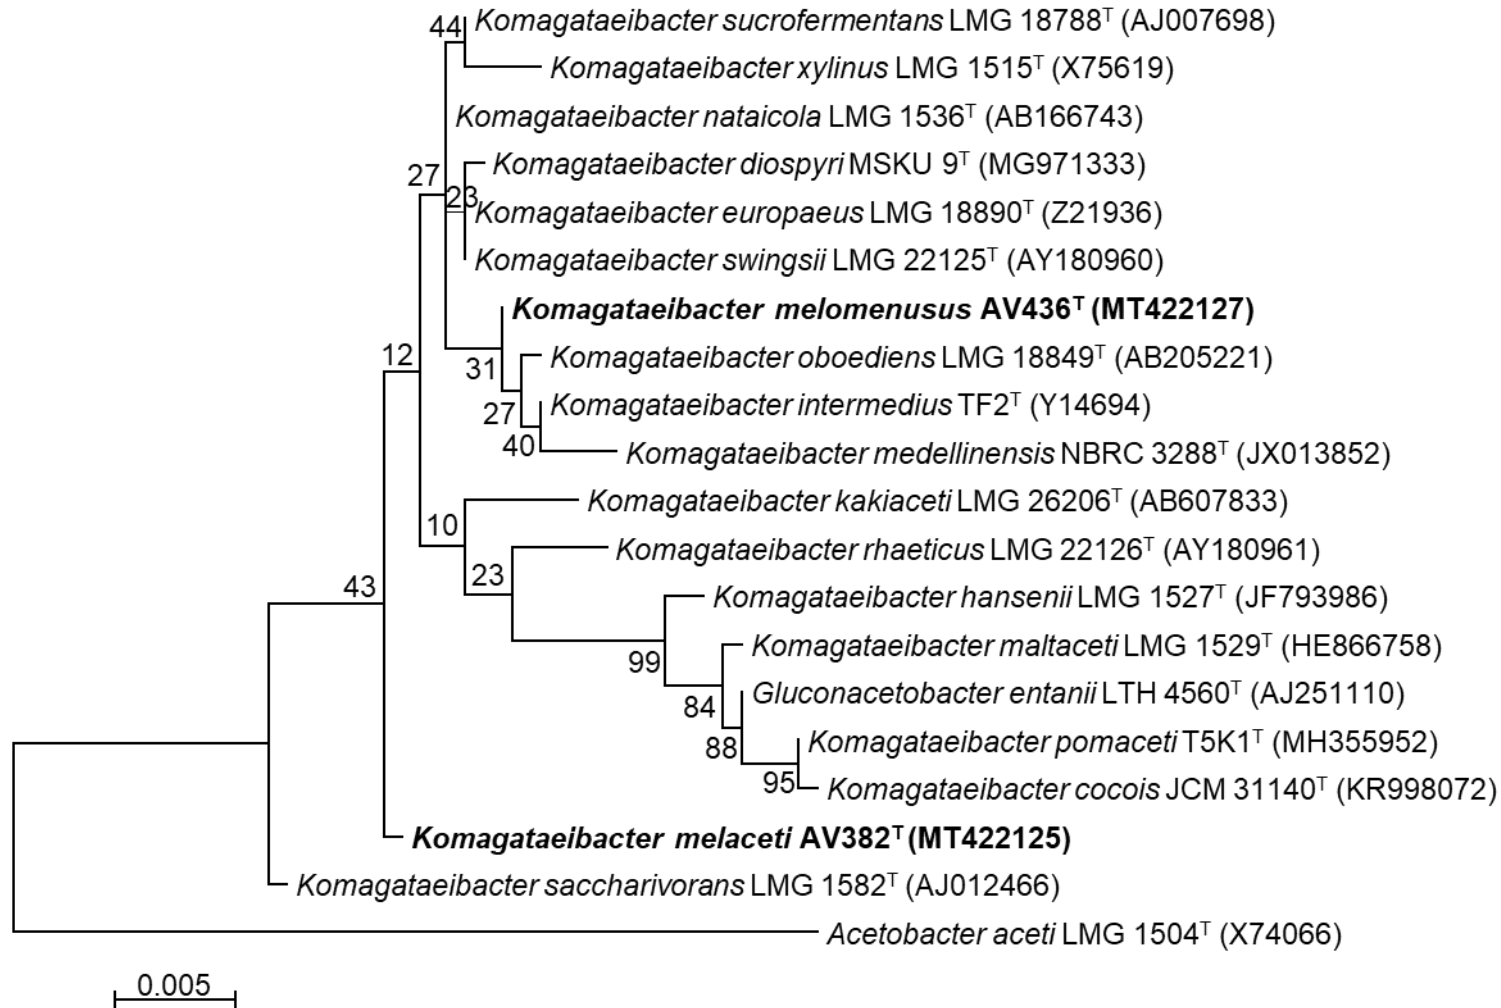

**Supplementary Figure S2:** Phylogenetic reconstruction based on 16S rRNA gene sequences of the type strains of species of *Komagataeibacter* genus. The tree was constructed using the maximum-likelihood method. Bootstrap values are indicated at branching (1000 replicates). *Acetobacter aceti* is included as outgroup. GenBank accession numbers are given in brackets and the scale bar represents the number of substitutions per nucleotide position.

**Supplementary Table 1:** ANIb (A) and ANIm (B) values for strains AV382 and AV436 in comparison to the type strains of species of the *Komagataeibacter* genus.

**A**

|                                            | 1    | 2    | 3    | 4    | 5    | 6    | 7    | 8    | 9    | 10   | 11   | 12   | 13   | 14   | 15   | 16   | 17   | 18   | 19   |
|--------------------------------------------|------|------|------|------|------|------|------|------|------|------|------|------|------|------|------|------|------|------|------|
| 1 <i>Komagataeibacter</i> sp. AV382        | *    | 82.6 | 81.4 | 75.4 | 77.5 | 83.1 | 75.6 | 82.9 | 88.2 | 77.9 | 80.7 | 82.3 | 82.7 | 81.9 | 82.8 | 82.6 | 83.3 | 77.9 | 82.4 |
| 2 <i>Komagataeibacter</i> sp. AV436        | 82.5 | *    | 81.7 | 75.4 | 78.3 | 83.2 | 75.8 | 82.9 | 83.3 | 78.3 | 81.3 | 90.9 | 82.9 | 82.9 | 81.0 | 91.5 | 83.5 | 77.8 | 91.5 |
| 3 <i>Komagataeibacter diospyri</i>         | 83.4 | 83.5 | *    | 77.0 | 76.7 | 90.9 | 75.9 | 89.3 | 83.8 | 77.1 | 82.9 | 82.8 | 88.5 | 83.7 | 83.5 | 82.4 | 91.8 | 76.7 | 82.4 |
| 4 <i>Komagataeibacter cocois</i>           | 77.0 | 76.9 | 77.1 | *    | 85.6 | 77.1 | 84.2 | 77.1 | 77.5 | 85.6 | 75.9 | 76.5 | 76.8 | 76.7 | 76.5 | 77.3 | 95.6 | 76.4 |      |
| 5 <i>Gluconacetobacter entanii</i>         | 77.5 | 78.1 | 75.7 | 83.1 | *    | 78.7 | 85.8 | 78.0 | 78.8 | 91.2 | 75.8 | 77.5 | 78.1 | 77.2 | 76.6 | 77.4 | 78.4 | 84.3 | 77.5 |
| 6 <i>Komagataeibacter europaeus</i>        | 83.5 | 83.7 | 87.2 | 75.4 | 79.3 | *    | 76.7 | 88.7 | 83.7 | 79.2 | 81.6 | 83.4 | 89.7 | 83.5 | 82.3 | 83.4 | 91.3 | 80.2 | 84.5 |
| 7 <i>Komagataeibacter hansenii</i>         | 75.5 | 76.1 | 75.5 | 82.6 | 85.7 | 76.4 | *    | 76.3 | 76.5 | 85.4 | 75.3 | 75.9 | 75.7 | 75.8 | 75.5 | 75.6 | 75.9 | 82.1 | 75.7 |
| 8 <i>Komagataeibacter intermedius</i>      | 84.6 | 84.2 | 85.9 | 74.8 | 80.5 | 89.5 | 76.2 | *    | 84.5 | 79.9 | 81.5 | 84.4 | 93.9 | 82.9 | 83.4 | 84.0 | 89.5 | 81.2 | 84.9 |
| 9 <i>Komagataeibacter kakiaceti</i>        | 88.4 | 83.2 | 81.9 | 75.9 | 78.6 | 83.5 | 76.1 | 83.1 | *    | 78.3 | 81.0 | 82.4 | 82.9 | 82.4 | 83.3 | 82.5 | 83.2 | 78.2 | 82.4 |
| 10 <i>Komagataeibacter maltaceti</i>       | 78.1 | 78.4 | 76.4 | 83.8 | 91.3 | 78.4 | 85.4 | 78.5 | 78.5 | *    | 76.9 | 78.1 | 77.9 | 77.1 | 76.6 | 78.5 | 78.9 | 84.6 | 78.1 |
| 11 <i>Komagataeibacter medellinensis</i>   | 80.9 | 81.7 | 81.0 | 74.9 | 76.1 | 82.0 | 74.9 | 82.0 | 81.4 | 76.9 | *    | 81.6 | 81.8 | 86.6 | 80.4 | 81.6 | 82.2 | 75.3 | 81.3 |
| 12 <i>Komagataeibacter nataicola</i>       | 82.2 | 91.1 | 81.7 | 75.9 | 77.4 | 82.9 | 75.5 | 83.1 | 82.4 | 78.1 | 81.4 | *    | 82.7 | 82.3 | 81.0 | 91.9 | 83.4 | 77.7 | 91.3 |
| 13 <i>Komagataeibacter oboediens</i>       | 82.7 | 82.6 | 85.7 | 75.3 | 78.5 | 89.3 | 76.1 | 93.8 | 82.7 | 77.9 | 81.4 | 82.7 | *    | 82.9 | 82.1 | 82.4 | 88.3 | 78.9 | 83.5 |
| 14 <i>Komagataeibacter rhaeticus</i>       | 81.6 | 82.9 | 81.6 | 76.0 | 77.3 | 83.5 | 75.5 | 82.9 | 82.1 | 77.2 | 85.9 | 82.3 | 83.1 | *    | 81.2 | 82.7 | 83.3 | 76.7 | 82.9 |
| 15 <i>Komagataeibacter saccharivorans</i>  | 82.7 | 81.2 | 81.3 | 75.1 | 76.5 | 82.3 | 75.5 | 82.7 | 83.3 | 76.4 | 80.2 | 81.1 | 82.0 | 81.4 | *    | 81.0 | 82.1 | 76.4 | 81.0 |
| 16 <i>Komagataeibacter sucrofermentans</i> | 82.6 | 91.7 | 80.8 | 75.5 | 77.4 | 83.0 | 75.3 | 83.1 | 82.8 | 78.2 | 81.5 | 92.3 | 82.6 | 82.7 | 81.1 | *    | 83.5 | 77.6 | 91.7 |
| 17 <i>Komagataeibacter swingsii</i>        | 83.0 | 83.4 | 88.8 | 76.1 | 78.2 | 91.1 | 75.9 | 88.6 | 82.8 | 78.5 | 81.7 | 83.3 | 88.1 | 83.2 | 81.8 | 83.3 | *    | 79.1 | 83.6 |
| 18 <i>Komagataeibacter pomaceti</i>        | 78.5 | 78.3 | 75.3 | 92.3 | 84.5 | 78.9 | 82.2 | 78.9 | 78.9 | 84.8 | 75.2 | 78.0 | 78.2 | 76.7 | 76.7 | 78.0 | 79.4 | *    | 78.4 |
| 19 <i>Komagataeibacter xylinus</i>         | 82.3 | 91.4 | 80.5 | 75.3 | 77.6 | 83.4 | 75.4 | 82.9 | 82.3 | 77.6 | 81.2 | 90.9 | 83.2 | 82.8 | 81.1 | 91.3 | 83.6 | 78.1 | *    |

**B**

|                                            | 1    | 2    | 3    | 4    | 5    | 6    | 7    | 8    | 9    | 10   | 11   | 12   | 13   | 14   | 15   | 16   | 17   | 18   | 19   |
|--------------------------------------------|------|------|------|------|------|------|------|------|------|------|------|------|------|------|------|------|------|------|------|
| 1 <i>Komagataeibacter</i> sp. AV382        | *    | 86.6 | 86.0 | 85.1 | 86.1 | 86.7 | 84.5 | 86.8 | 90.0 | 86.6 | 85.1 | 86.2 | 86.2 | 85.9 | 85.9 | 86.5 | 86.8 | 87.0 | 86.3 |
| 2 <i>Komagataeibacter</i> sp. AV436        | 86.6 | *    | 86.4 | 84.9 | 86.9 | 86.9 | 85.1 | 86.7 | 87.1 | 86.6 | 85.6 | 92.2 | 86.3 | 86.6 | 85.4 | 92.6 | 86.9 | 86.9 | 92.7 |
| 3 <i>Komagataeibacter diospyri</i>         | 86.0 | 86.4 | *    | 84.9 | 84.9 | 92.0 | 84.8 | 90.4 | 86.4 | 85.2 | 86.3 | 86.1 | 89.9 | 86.6 | 86.2 | 86.2 | 92.6 | 84.8 | 86.2 |
| 4 <i>Komagataeibacter cocois</i>           | 85.1 | 84.9 | 84.9 | *    | 87.6 | 85.3 | 86.9 | 85.0 | 85.2 | 87.7 | 84.8 | 85.0 | 84.9 | 85.5 | 85.3 | 85.0 | 85.2 | 95.7 | 85.0 |
| 5 <i>Gluconacetobacter entanii</i>         | 86.2 | 86.9 | 84.9 | 87.6 | *    | 86.9 | 88.0 | 86.8 | 86.9 | 92.3 | 84.5 | 86.2 | 86.4 | 85.4 | 85.2 | 86.4 | 86.2 | 87.6 | 85.9 |
| 6 <i>Komagataeibacter europaeus</i>        | 86.7 | 86.9 | 92.0 | 85.3 | 86.9 | *    | 85.5 | 90.3 | 87.3 | 86.7 | 86.0 | 86.6 | 90.6 | 86.7 | 86.1 | 86.6 | 92.2 | 87.4 | 87.0 |
| 7 <i>Komagataeibacter hansenii</i>         | 84.5 | 85.1 | 84.8 | 86.9 | 88.0 | 85.5 | *    | 85.1 | 84.8 | 87.8 | 84.5 | 85.2 | 84.7 | 84.8 | 84.9 | 85.0 | 84.4 | 86.1 | 84.9 |
| 8 <i>Komagataeibacter intermedius</i>      | 86.8 | 86.7 | 90.4 | 85.0 | 86.8 | 90.3 | 85.1 | *    | 87.1 | 87.2 | 85.8 | 86.9 | 94.7 | 86.4 | 86.5 | 86.9 | 90.4 | 88.2 | 86.9 |
| 9 <i>Komagataeibacter kakiaceti</i>        | 90.0 | 87.1 | 86.4 | 85.2 | 86.9 | 87.3 | 84.8 | 87.1 | *    | 86.6 | 85.5 | 86.5 | 86.8 | 86.5 | 86.6 | 86.6 | 87.1 | 86.7 | 86.4 |
| 10 <i>Komagataeibacter maltaceti</i>       | 86.6 | 86.8 | 85.2 | 87.7 | 92.2 | 86.7 | 87.8 | 87.2 | 86.6 | *    | 86.6 | 86.6 | 86.3 | 85.3 | 85.2 | 87.1 | 86.7 | 87.9 | 86.2 |
| 11 <i>Komagataeibacter medellinensis</i>   | 85.1 | 85.6 | 86.3 | 84.8 | 84.5 | 86.0 | 84.5 | 85.8 | 85.5 | 86.6 | *    | 85.6 | 85.7 | 88.1 | 85.0 | 85.5 | 85.9 | 84.7 | 85.5 |
| 12 <i>Komagataeibacter nataicola</i>       | 86.2 | 92.2 | 86.1 | 85.0 | 86.2 | 86.6 | 85.2 | 86.9 | 86.5 | 86.6 | 85.6 | *    | 86.2 | 86.2 | 85.3 | 93.0 | 86.9 | 86.9 | 92.3 |
| 13 <i>Komagataeibacter oboediens</i>       | 86.2 | 86.3 | 89.9 | 84.9 | 86.4 | 90.6 | 84.7 | 94.7 | 86.8 | 86.2 | 85.7 | 86.2 | *    | 86.4 | 85.8 | 86.2 | 89.7 | 86.7 | 86.6 |
| 14 <i>Komagataeibacter rhaeticus</i>       | 85.9 | 86.6 | 86.6 | 85.5 | 85.4 | 86.7 | 84.8 | 86.4 | 86.5 | 85.2 | 88.1 | 86.2 | 86.4 | *    | 85.5 | 86.3 | 86.7 | 85.1 | 86.5 |
| 15 <i>Komagataeibacter saccharivorans</i>  | 85.9 | 85.4 | 86.2 | 85.3 | 85.2 | 86.1 | 84.9 | 86.5 | 86.6 | 85.2 | 85.1 | 85.3 | 85.8 | 85.5 | *    | 85.3 | 85.9 | 85.0 | 85.3 |
| 16 <i>Komagataeibacter sucrofermentans</i> | 86.5 | 92.6 | 86.2 | 85.0 | 86.4 | 86.6 | 85.0 | 86.9 | 86.6 | 87.1 | 85.5 | 93.0 | 86.2 | 86.3 | 85.3 | *    | 86.9 | 87.2 | 92.5 |
| 17 <i>Komagataeibacter swingsii</i>        | 86.8 | 86.9 | 92.6 | 85.2 | 86.2 | 92.2 | 84.5 | 90.3 | 87.1 | 86.7 | 85.9 | 86.9 | 89.7 | 86.7 | 85.9 | 86.9 | *    | 87.6 | 87.0 |
| 18 <i>Komagataeibacter pomaceti</i>        | 87.0 | 86.9 | 84.8 | 95.7 | 87.6 | 87.4 | 86.1 | 88.2 | 86.7 | 87.9 | 84.7 | 86.9 | 86.7 | 85.1 | 85.1 | 87.2 | 87.6 | *    | 87.4 |
| 19 <i>Komagataeibacter xylinus</i>         | 86.3 | 92.7 | 86.2 | 85.0 | 85.9 | 87.0 | 84.9 | 86.9 | 86.4 | 86.3 | 85.5 | 92.3 | 86.7 | 86.5 | 85.3 | 92.5 | 87.0 | 87.4 | *    |

**Supplementary Table 2:** Digital DNA-DNA hybridization values of strains AV382 and AV436 in comparison to type strains of species of genus *Komagataeibacter*.

|                                            | 1    | 2    | 3    | 4    | 5    | 6    | 7    | 8    | 9    | 10   | 11   | 12   | 13   | 14   | 15   | 16   | 17   | 18   | 19   | 20   |
|--------------------------------------------|------|------|------|------|------|------|------|------|------|------|------|------|------|------|------|------|------|------|------|------|
| 1 <i>Komagataeibacter</i> AV382            | -    | 27.3 | 22.8 | 28.2 | 21.0 | 28.0 | 37.7 | 21.1 | 23.7 | 24.5 | 26.5 | 27.1 | 26.0 | 26.7 | 26.9 | 28.2 | 23.8 | 26.7 | 21.5 | 27.3 |
| 2 <i>Komagataeibacter</i> AV436            | 27.3 | -    | 23.4 | 28.6 | 21.4 | 28.1 | 29.5 | 21.1 | 23.5 | 25.4 | 45.4 | 27.2 | 27.4 | 25.2 | 46.9 | 28.3 | 24.0 | 47.3 | 22.2 | 21.8 |
| 3 <i>Gluconacetobacter entanii</i>         | 22.8 | 23.4 | -    | 24.8 | 31.8 | 24.1 | 26.0 | 31.7 | 45.5 | 21.1 | 23.0 | 23.7 | 21.9 | 21.7 | 22.7 | 23.5 | 29.1 | 22.6 | 29.1 | 21.6 |
| 4 <i>Komagataeibacter europaeus</i>        | 28.2 | 28.6 | 24.8 | -    | 22.1 | 39.3 | 30.2 | 21.3 | 24.5 | 26.3 | 28.0 | 40.6 | 28.2 | 26.6 | 28.1 | 46.1 | 26.1 | 29.3 | 22.3 | 43.7 |
| 5 <i>Komagataeibacter hansenii</i>         | 21.0 | 21.4 | 31.8 | 22.1 | -    | 21.4 | 22.5 | 90.7 | 31.3 | 20.7 | 21.5 | 21.1 | 20.9 | 21.3 | 21.1 | 21.0 | 26.4 | 21.4 | 28.4 | 21.2 |
| 6 <i>Komagataeibacter intermedius</i>      | 28.0 | 28.1 | 24.1 | 39.3 | 21.4 | -    | 29.6 | 21.2 | 24.2 | 26.0 | 28.1 | 57.7 | 27.6 | 27.2 | 28.0 | 38.9 | 25.3 | 28.3 | 21.5 | 37.8 |
| 7 <i>Komagataeibacter kakiaceti</i>        | 37.7 | 29.5 | 26.0 | 30.2 | 22.5 | 29.6 | -    | 22.2 | 25.6 | 26.5 | 28.3 | 28.8 | 28.0 | 28.8 | 28.3 | 29.4 | 25.7 | 27.9 | 22.5 | 29.1 |
| 8 <i>Komagataeibacter kombuchae</i>        | 21.1 | 21.1 | 31.7 | 21.3 | 90.7 | 21.2 | 22.2 | -    | 31.5 | 20.6 | 21.5 | 21.0 | 20.8 | 20.8 | 21.1 | 21.2 | 26.2 | 21.1 | 28.3 | 21.1 |
| 9 <i>Komagataeibacter maltaceti</i>        | 23.7 | 23.5 | 45.5 | 24.5 | 31.3 | 24.2 | 25.6 | 31.5 | -    | 22.7 | 23.5 | 22.9 | 22.0 | 21.6 | 23.7 | 23.8 | 29.6 | 22.8 | 29.2 | 21.8 |
| 10 <i>Komagataeibacter medellinensis</i>   | 24.5 | 25.4 | 21.1 | 26.3 | 20.7 | 26.0 | 26.5 | 20.6 | 22.7 | -    | 25.3 | 25.8 | 32.5 | 24.3 | 25.1 | 26.1 | 20.8 | 25.1 | 21.3 | 26.6 |
| 11 <i>Komagataeibacter nataicola</i>       | 26.5 | 45.4 | 23.0 | 28.0 | 21.5 | 28.1 | 28.3 | 21.5 | 23.5 | 25.3 | -    | 27.1 | 26.5 | 24.9 | 48.9 | 28.4 | 23.8 | 45.4 | 21.2 | 26.5 |
| 12 <i>Komagataeibacter oboediens</i>       | 27.1 | 27.2 | 23.7 | 40.6 | 21.1 | 57.7 | 28.8 | 21.0 | 22.9 | 25.8 | 27.1 | -    | 27.5 | 26.1 | 27.0 | 37.3 | 24.1 | 27.9 | 21.6 | 37.3 |
| 13 <i>Komagataeibacter rhaeticus</i>       | 26.0 | 27.4 | 21.9 | 28.2 | 20.9 | 27.6 | 28.0 | 20.8 | 22.0 | 32.5 | 26.5 | 27.5 | -    | 25.5 | 26.7 | 27.9 | 21.7 | 27.1 | 21.8 | 27.4 |
| 14 <i>Komagataeibacter saccharivorans</i>  | 26.7 | 25.2 | 21.7 | 26.6 | 21.3 | 27.2 | 28.8 | 20.8 | 21.6 | 24.3 | 24.9 | 26.1 | 25.5 | -    | 24.9 | 26.2 | 21.6 | 25.2 | 21.6 | 27.2 |
| 15 <i>Komagataeibacter sucrofermentans</i> | 26.9 | 46.9 | 22.7 | 28.1 | 21.1 | 28.0 | 28.3 | 21.1 | 23.7 | 25.1 | 48.9 | 27.0 | 26.7 | 24.9 | -    | 28.3 | 23.7 | 46.6 | 22.0 | 26.4 |
| 16 <i>Komagataeibacter swingsii</i>        | 28.2 | 28.3 | 23.5 | 46.1 | 21.0 | 38.9 | 29.4 | 21.2 | 23.8 | 26.1 | 28.4 | 37.3 | 27.9 | 26.2 | 28.3 | -    | 24.7 | 28.6 | 21.2 | 47.0 |
| 17 <i>Komagataeibacter cocois</i>          | 23.8 | 24.0 | 29.1 | 26.1 | 26.4 | 25.3 | 25.7 | 26.2 | 29.6 | 20.8 | 23.8 | 24.1 | 21.7 | 21.6 | 23.7 | 24.7 | -    | 24.8 | 62.3 | 21.6 |
| 18 <i>Komagataeibacter xylinus</i>         | 26.7 | 47.3 | 22.6 | 29.3 | 21.4 | 28.3 | 27.9 | 21.1 | 22.8 | 25.1 | 45.4 | 27.9 | 27.1 | 25.2 | 46.6 | 28.6 | 24.8 | -    | 22.2 | 27.0 |
| 19 <i>Komagataeibacter pomaceti</i>        | 21.5 | 22.2 | 29.1 | 22.3 | 28.4 | 21.5 | 22.5 | 28.3 | 29.2 | 21.3 | 21.2 | 21.6 | 21.8 | 21.6 | 22.0 | 21.2 | 62.3 | 22.2 | -    | 21.7 |
| 20 <i>Komagataeibacter diospyri</i>        | 27.3 | 21.8 | 21.6 | 43.7 | 21.2 | 37.8 | 29.1 | 21.1 | 21.8 | 26.6 | 26.5 | 37.3 | 27.4 | 27.2 | 26.4 | 47.0 | 21.6 | 27.0 | 21.7 | -    |

**Supplementary Table 3:** List of putative efflux protein subunits in genomes of strains AV382 and AV436.

| Type of putative transporter                        | Strain       |              |
|-----------------------------------------------------|--------------|--------------|
|                                                     | AV436        | AV382        |
| Efflux RND transporter permease subunit             |              | WP_116701804 |
|                                                     |              | WP_116701963 |
|                                                     | WP_172154261 | WP_116702069 |
|                                                     | WP_172154930 | WP_116702137 |
|                                                     | WP_172155105 | WP_116702281 |
|                                                     | WP_172156463 | WP_116702311 |
|                                                     | WP_172156575 | WP_116702312 |
|                                                     | WP_172157792 | WP_116703193 |
|                                                     | WP_172157794 | WP_116703311 |
|                                                     | WP_172158299 | WP_116703400 |
|                                                     | NPC66221     | WP_116703590 |
| CusA/CzcA family heavy metal efflux RND transporter | WP_172154581 |              |
|                                                     | WP_172155688 |              |
| Multidrug efflux SMR transporter                    | WP_172155667 | WP_116702187 |
|                                                     | WP_172154795 |              |
| DHA2 family efflux MFS transporter permease subunit | WP_172156362 | WP_116702774 |
|                                                     | WP_172157129 | WP_116702786 |
|                                                     | WP_172157284 | WP_116702847 |
|                                                     | WP_172158620 | WP_116703365 |
|                                                     | WP_172158636 | WP_116703523 |
|                                                     | WP_172158899 | WP_116704004 |
|                                                     | NPC66688     |              |
